# Supplementary material for: High-resolution quantification of root dynamics in split-nutrient rhizoslides reveals rapid and strong proliferation of maize roots in response to local high nitrogen
Source: PubMed Central journal article supplement (PMC4585423; doi:10.1093/jxb/erv307), 2015-06-23
Supplement: supp_erv307_jexbot149765_file001.pdf [file supp_erv307_jexbot149765_file001.pdf]

### Supplementary Figure 1

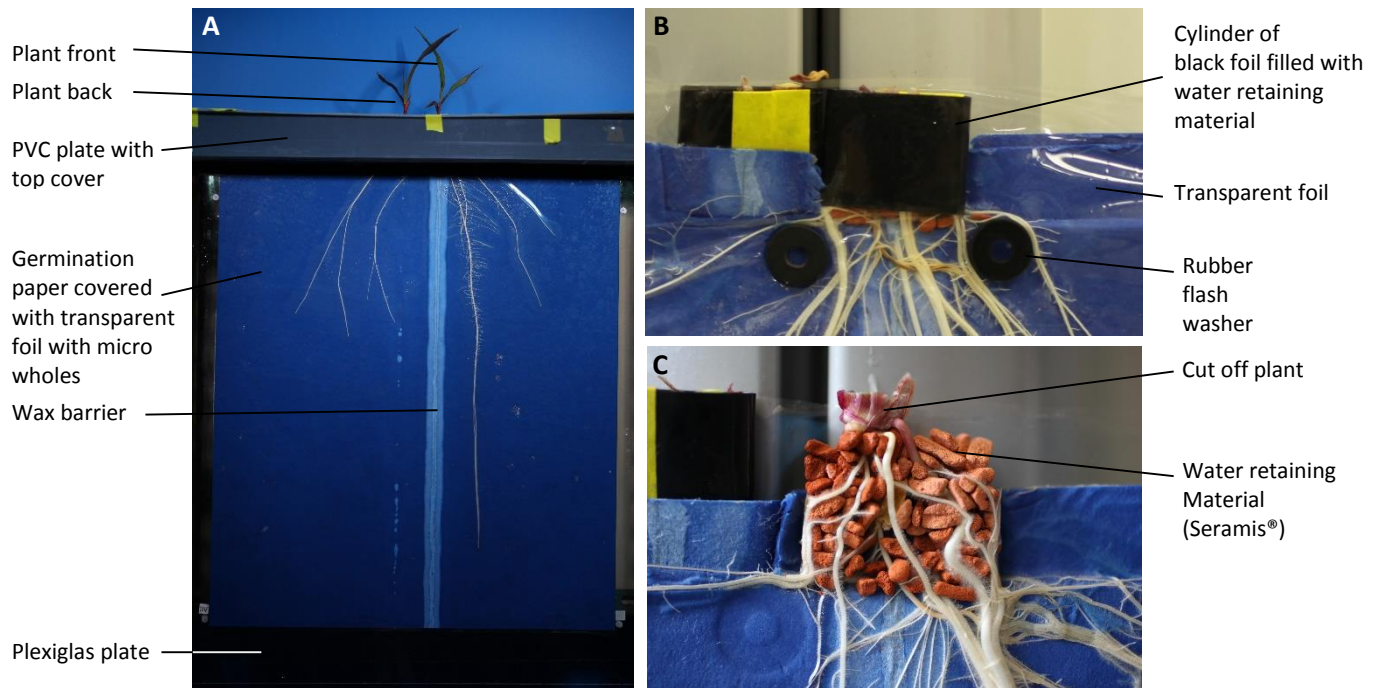

**Supplementary Figure 1** (A) The split-root rhizoslide system, (B) top of the rhizoslide without the PVC plates and top cover, and (C) with the transparent and black foil cylinder removed.

**Supplementary figure 2**

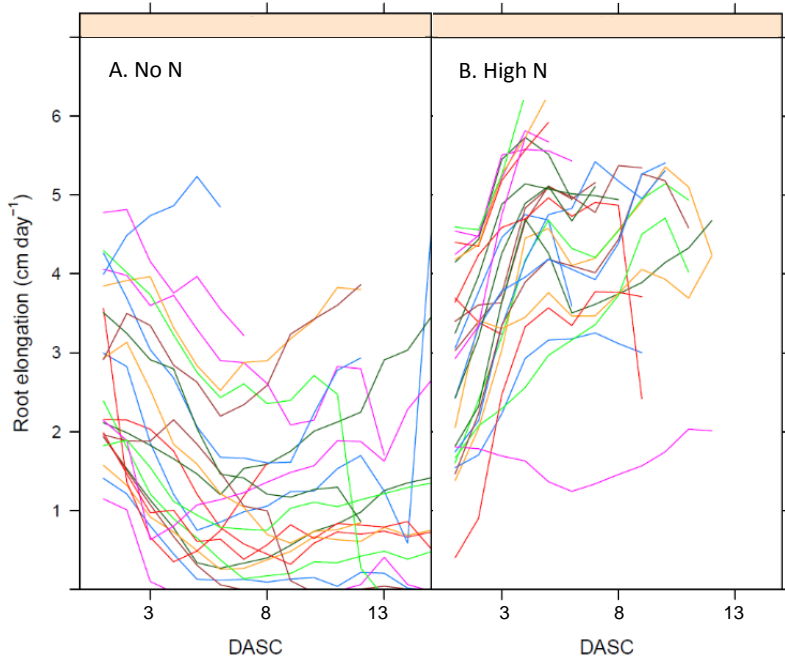

**Supplementary Figure 2** Root elongation rates of individual maize (*Zea mays* L.) crown roots grown in a split-root rhizoside system with half the roots in a no N compartment (A) and the other half in a high N compartment (B) over time. Different coloured lines indicate different roots and time is given in days after solution change (DASC).

Supplementary Figure 3

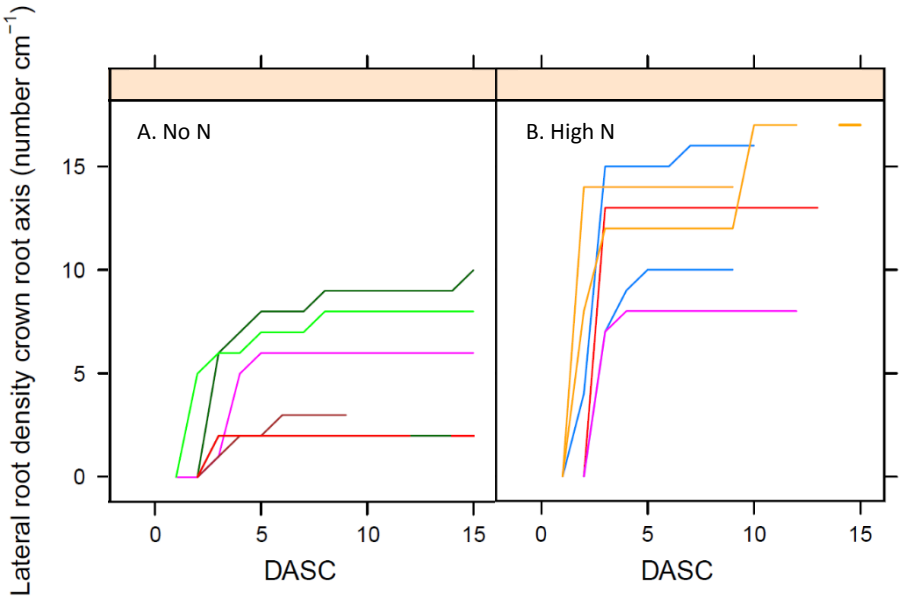

**Supplementary Figure 3** Lateral root density on the crown root axis of maize (*Zea mays* L.) for roots grown in a split-root rhizoside system with half the roots in a no N compartment (A) and the other half in a high N compartment (B) over time. The number in the orange box indicates the plant number. Time is given in days after solution change (DASC).

Supplementary Figure 4

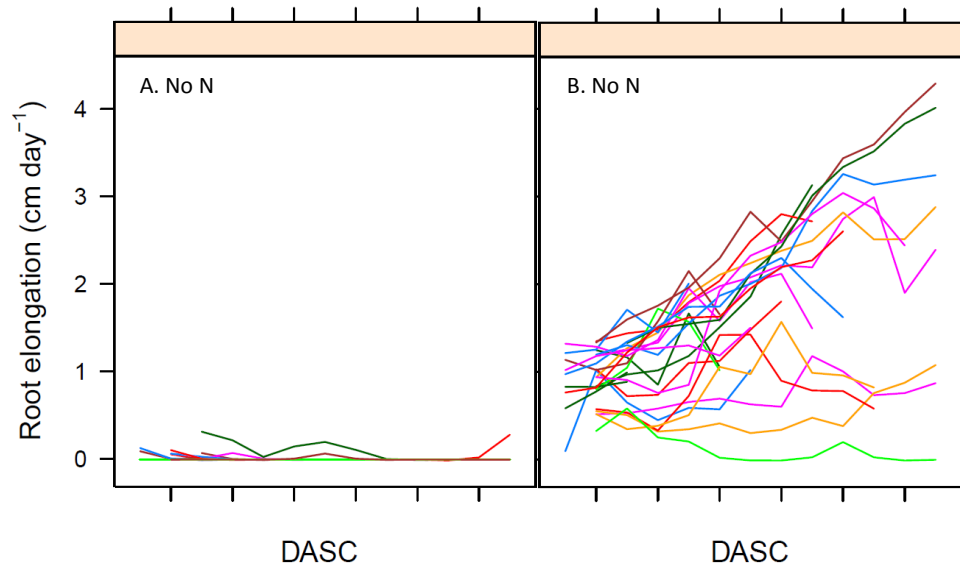

**Supplementary Figure 4** Lateral root elongation rates of individual roots of maize (*Zea mays* L.) of crown roots grown in a split-root rhizoslides system with half the roots in a no N compartment (A) and the other half in a high N compartment (B). The number in the orange box indicates the plant number, and different coloured lines indicate different roots. Time is given in days after solution change (DASC).

**Supplementary Figure 5**

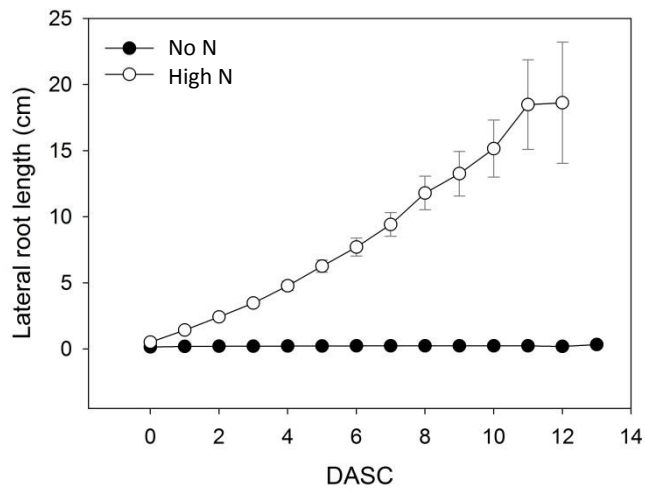

**Supplementary Figure 5** Crown lateral root length of *Zea mays* L. plants over time grown in a split-root rhizoslides system with half the root system in no N and the other half in high N. Time is given in days after solution change (DASC).

**Supplementary Figure 6**

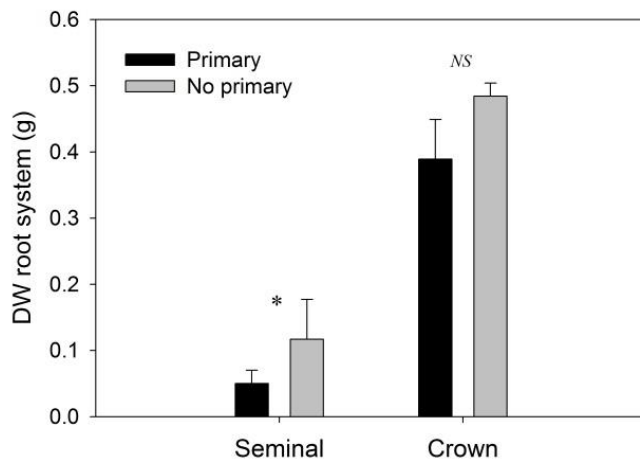

**Supplementary Figure 6** Dry weight (DW) of the seminal and crown root system of *Zea mays* plants grown in rhizoslides. The primary root of half the plants was removed 2 d after transplantation into the rhizoslides. Values are means (n=9). Asterisks indicate significant difference between plants with a primary root and plants without a primary root ( $p < 0.05$ ); NS, no significant difference ( $p > 0.05$ ).
